# Supplementary material
Source: HighWire-hosted journal article supplement (http://rc.rcjournal.com/highwire/filestream/11916/field_highwire_adjunct_files/0/Richards_RC1745_Suppl.pdf)
Supplement: Richards_RC1745_Suppl.pdf [file Richards_RC1745_Suppl.pdf]

**Respiratory Therapy Knowledge Assessment Tool (RT KAT)**

1. The apprentice is able to discuss the characteristics of lung disease in CF patients.

Strongly disagree                  Disagree                  Agree                  Strongly agree

2. The apprentice is able to discuss the important pathogens of the CF airway.

Strongly disagree                  Disagree                  Agree                  Strongly agree

3. The apprentice is able to discuss ways to prevent patient-to-patient transmission of these pathogens in the inpatient, outpatient, and home setting.

Strongly disagree                  Disagree                  Agree                  Strongly agree

4. The apprentice demonstrates an understanding of the importance for the cleaning and disinfecting of respiratory equipment that touch mucous membranes.

Strongly disagree                  Disagree                  Agree                  Strongly agree

5. The apprentice demonstrates an understanding that the prescription of airway clearance therapy should be individualized based on factors such as age, severity of pulmonary disease, patient preference, and adverse events, among others.

Strongly disagree                  Disagree                  Agree                  Strongly agree

6. The apprentice is able to discuss, demonstrate, and instruct patients in the following airway clearance techniques: P&PD, ACBT, AD, PEP/AOD, IPV, HFCC, and Huff Coughing.

|                | Strongly disagree        | Disagree                 | Agree                    | Strongly agree           |
|----------------|--------------------------|--------------------------|--------------------------|--------------------------|
| P&PD:          | <input type="checkbox"/> | <input type="checkbox"/> | <input type="checkbox"/> | <input type="checkbox"/> |
| ACBT:          | <input type="checkbox"/> | <input type="checkbox"/> | <input type="checkbox"/> | <input type="checkbox"/> |
| AD:            | <input type="checkbox"/> | <input type="checkbox"/> | <input type="checkbox"/> | <input type="checkbox"/> |
| PEP/AOD:       | <input type="checkbox"/> | <input type="checkbox"/> | <input type="checkbox"/> | <input type="checkbox"/> |
| IPV:           | <input type="checkbox"/> | <input type="checkbox"/> | <input type="checkbox"/> | <input type="checkbox"/> |
| HFCC:          | <input type="checkbox"/> | <input type="checkbox"/> | <input type="checkbox"/> | <input type="checkbox"/> |
| Huff Coughing: | <input type="checkbox"/> | <input type="checkbox"/> | <input type="checkbox"/> | <input type="checkbox"/> |

7. The apprentice is able to identify the chronic medications used by CF patients and the pulmonary guidelines recommendations for their use.

Strongly disagree                  Disagree                  Agree                  Strongly agree

8. The apprentice is knowledgeable as to the use of these medications at his/her center based on registry data.

Strongly disagree                  Disagree                  Agree                  Strongly agree

9. The apprentice is able to identify and discuss adverse side effects of these medications.

Strongly disagree                  Disagree                  Agree                  Strongly agree

10. The apprentice is able to recommend the proper equipment (e.g. nebulizers, compressors) to deliver these medications.

Strongly disagree                  Disagree                  Agree                  Strongly agree

11. The apprentice is able to recommend the proper suggested order of therapies for patients.

Strongly disagree                  Disagree                  Agree                  Strongly agree

12. The apprentice is able to select/develop handouts, assessments, action plans, etc. for CF patients/families to support the education provided in clinic/hospital.

Strongly disagree                  Disagree                  Agree                  Strongly agree

13. The apprentice is able to assess and respond to the patient's/family's airway clearance needs (e.g. techniques allowing for greater independence, goal setting and problem-solving skills when barriers arise).

Strongly disagree                  Disagree                  Agree                  Strongly agree
